# Supplementary material
Source: PubMed Central journal article supplement (PMC3426134)
Supplement: supp_tpc.112.099051_tpc099051supplemental.pdf [file supp_tpc.112.099051_tpc099051supplemental.pdf]

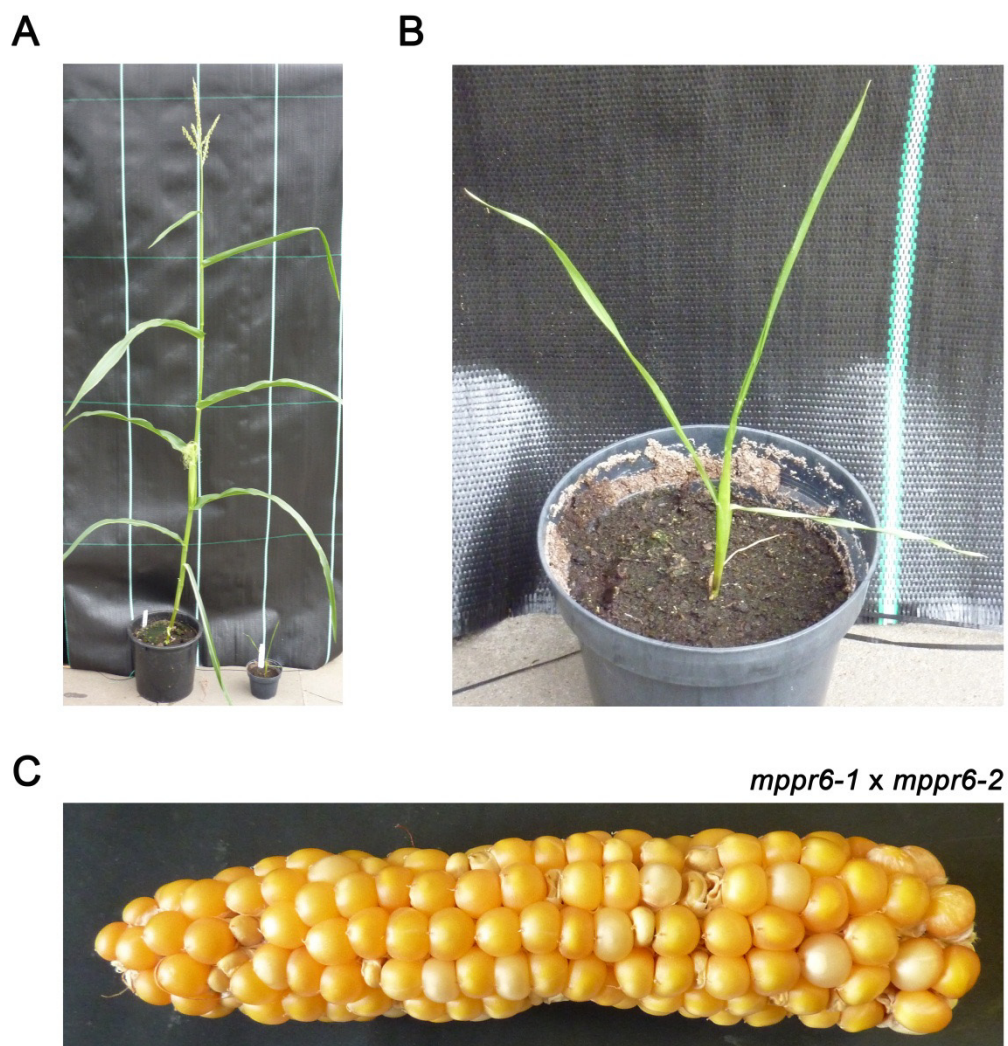

**D**

| mutant           | Number of wild-type seeds | Number of mutant seeds | $\chi^2$ |
|------------------|---------------------------|------------------------|----------|
| <i>mppr6-1_1</i> | 140                       | 45                     | 0,045    |
| <i>mppr6-1_2</i> | 138                       | 43                     | 0,128    |
| <i>mppr6-1_3</i> | 80                        | 24                     | 0,205    |
| <i>mppr6-1_4</i> | 110                       | 38                     | 0,036    |
| <i>appr6-1</i>   | 61                        | 19                     | 0,067    |
| <i>appr6-2</i>   | 93                        | 29                     | 0,098    |
| <i>appr6-3</i>   | 66                        | 21                     | 0,035    |

**Supplemental Figure 1.** Phenotype and Segregation of *mppr6*.

(A) Comparison of wild type (left) and *mppr6*<sup>-/-</sup> (right) rescued plants.

(B) Close-up view of 4 months old *mppr6* mutant plant.

(C) Allelism test. Segregating *mppr6* ear resulting from crossing *mppr6-1* and *mppr6-2*.

(D) Genetic segregation ratios of *mppr6-1*, *appr6-1*, *appr6-2*, and *appr6-3*.

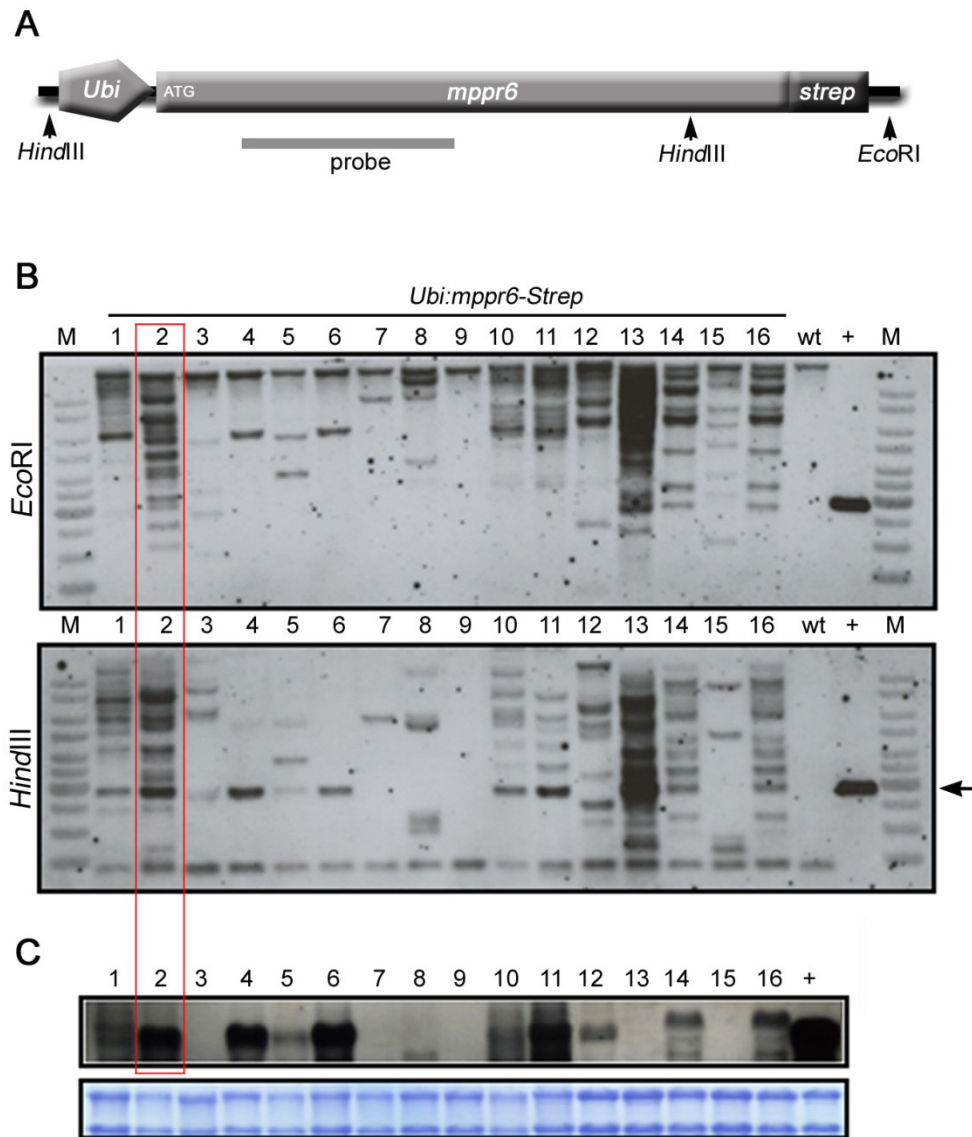

**Supplemental Figure 2.** Molecular Analysis of *mppr6-strep* Transgenic Plants.

**(A)** Diagram of the *Ubi:mppr6-strep* transgene. The recognition sites of the restriction enzymes and the region comprising the probe used in **(B)** are indicated.

**(B)** DNA gel blot analysis of putative *Ubi:mppr6-strep* transgenic plants. The binding region of the DIG-labeled *mppr6*-specific probe is shown in **(A)**. As a positive control (+), the *Ubi:mppr6-strep* containing plasmid was digested with *Hind*III. The expected size of the *Hind*III band is indicated by arrow. M, molecular marker; wt, wild-type; +, positive control.

**(C)** RNA gel blot analysis of putative *Ubi:mppr6-Strep* transgenic plants. A transgenic *Arabidopsis 35S:mppr6* plant was used as positive control (+). The methylene blue staining of the ribosomal RNA is shown in the panel below as a loading control. The transgenic *PUbi:mppr6-strep* plant (2) used in the immunodetection and co-immunoprecipitation experiment is framed by a quadrangle.

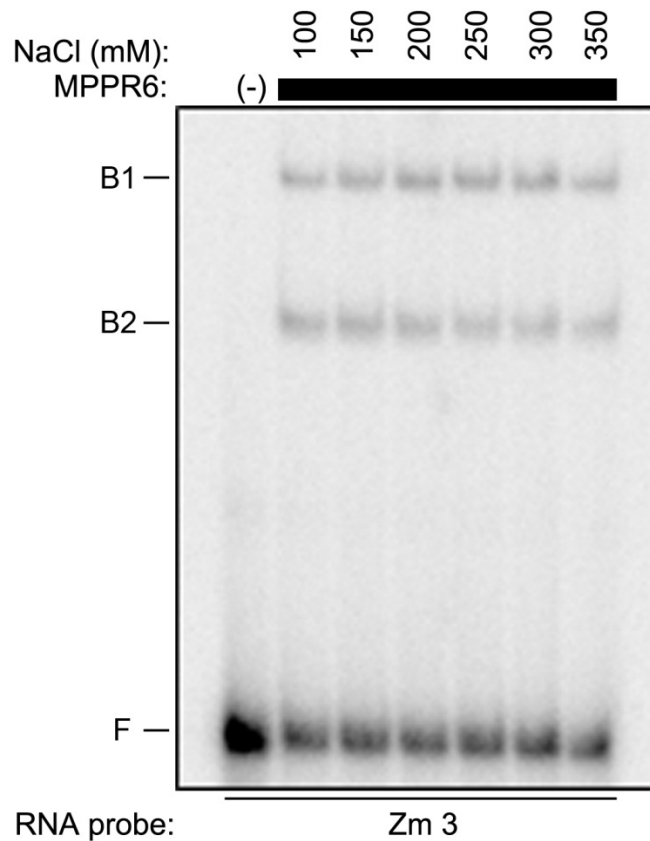

**Supplemental Figure 3.** MPPR6 Binds to 5' UTR of *rps3* RNA at High Salt Conditions.

Sequence specificity of MPPR6 binding was demonstrated by an EMSA experiment at high monovalent salt concentrations. The interaction was explored at a range of increasing NaCl concentrations (100 – 350 mM) using 250 nM recombinant MPPR6 and 100 pM of 5' UTR of *rps3* (Zm 3, 75 nt, see Fig. 10 (A)). Even at 350 mM of NaCl none of the shifted bands disappeared, indicating sequence specificity of binding. B1 and B2, bound RNA; F, free RNA.

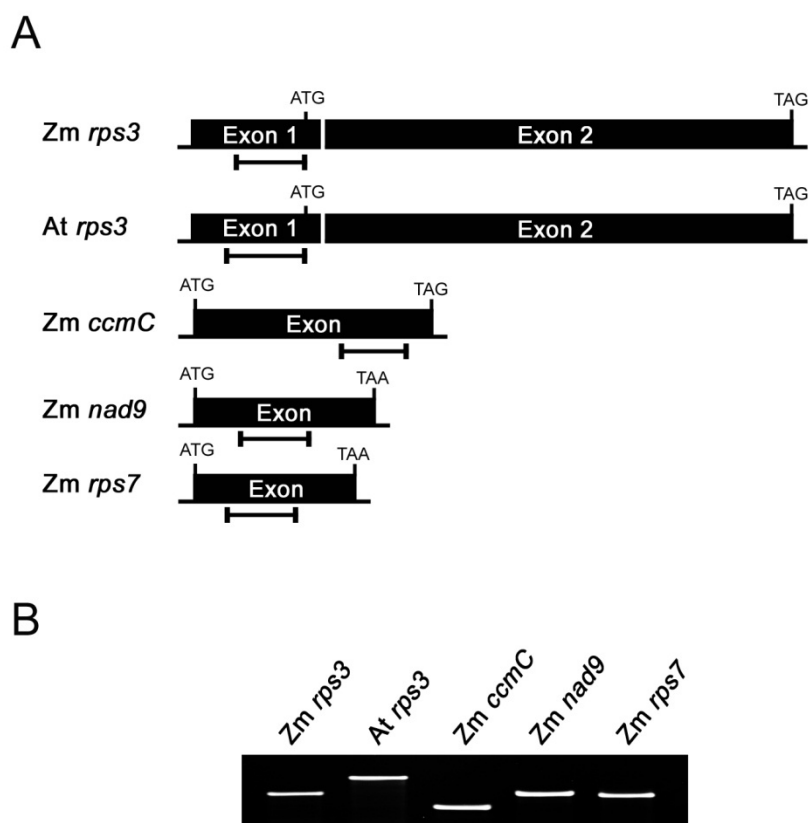

**Supplemental Figure 4.** Unlabeled Competitor RNA.

**(A)** Diagrams of the exon organization of *Zm rps3*, *At rps3*, *Zm ccmC*, *Zm nad9*, and *Zm rps7*. The regions used as template for production of cold competitor RNA are indicated below (black lines). Start (ATG) and stop (TAA, TAG) codons are shown.

**(B)** Unlabeled RNA used in the competition experiments (see Fig. 10 (C)). 200 ng of unlabeled RNA was separated on 5% denaturing polyacrylamide gel and stained with ethidium bromide. RNA was generated by in vitro transcription using T7 polymerase and the PCR amplified regions of *Zm rps3* (primers: *rps3\_7fw/9rev*), *At rps3* (primers: *rps3at\_2fw/rev*), *Zm ccmC* (primers: *ccmC\_fw/rev*), *Zm nad9* (primers: *nda9\_1fw/rev*), and *Zm rps7* (primers: *rps7\_1fw/rev*) indicated in (A). After synthesis, RNA was treated with DNase I, gel-purified and quantified using absorption of light at 260 and 280 nm (A<sub>260/280</sub>).

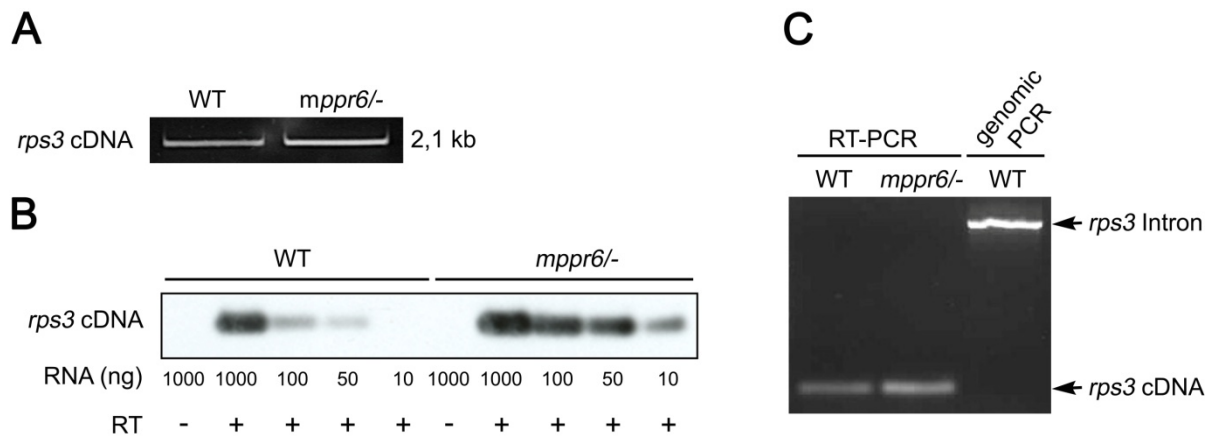

**Supplemental Figure 5.** Analyses of *rps3* Transcripts.

Total RNA extracted from 16 DAP wild-type and *mppr6* mutant embryos were treated with DNase I and used for cDNA synthesis utilizing hexanucleotides.

**A)** The complete ORF and parts of the UTRs of *rps3* in *mppr6* mutant and the wild type were amplified by RT-PCR. The forward primer was located 104 bp upstream of the ATG, the reverse primer 276 bp downstream of the stop codon (*rps3\_2fw* and *rps3\_2rev*).

**B)** Abundance of *rps3* mRNA in the wild type and *mppr6* mutant. Different amounts of RNA were used for cDNA synthesis. RT-PCRs with primers flanking the intron (*rps3\_1fw* and *rps3\_1rev*) were carried out to amplify the *mppr6* mRNA. Low cycle conditions were chosen to yield PCR products that approximately mirror the input RNA amounts.

**C)** The *rps3* intron is spliced out in the *mppr6* mutant. RT-PCR was performed using primers flanking the intron (see **(B)**). Genomic PCR was carried out as a control for intron amplification (PCR profile as above). The intron and intron-free amplification products are indicated by arrows.

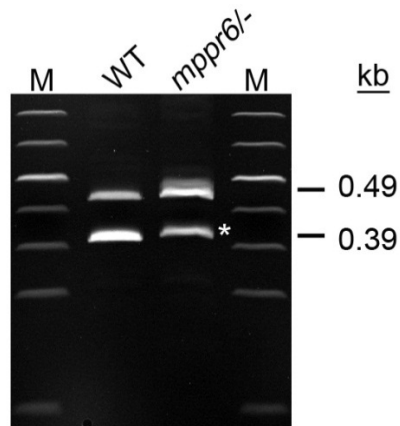

**Supplemental Figure 6.** *Rps3* cRT-PCR Products Separated on Polyacrylamide Gel.

In order to achieve a higher resolution, products of circular RT-PCR were additionally separated on a denaturing 5% polyacrylamide gel. The shift corresponding to the prolonged 5' *rps3* transcript ends in the *mppr6* mutant is marked by an asterisk.

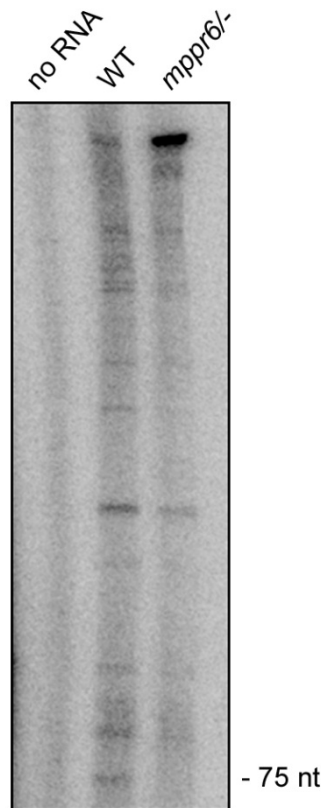

**Supplemental Figure 7.** Mapping of *rps3* 5' Termini by Primer Extension Assay.

Total RNA was extracted from callus tissue of wild type and *mppr6*<sup>-/-</sup> mutants. The *rps3* transcript ends were analyzed with a primer (*rps3*\_11) binding 6 nt downstream of the ATG. Primer extension products were resolved on a denaturing 10% polyacrylamide gel. For size determination, a 75 nt oligo corresponding to the length of the mature 5' *rps3* transcript ends (see cRT-PCR products in Figure 13) was run on a site lane (not shown).

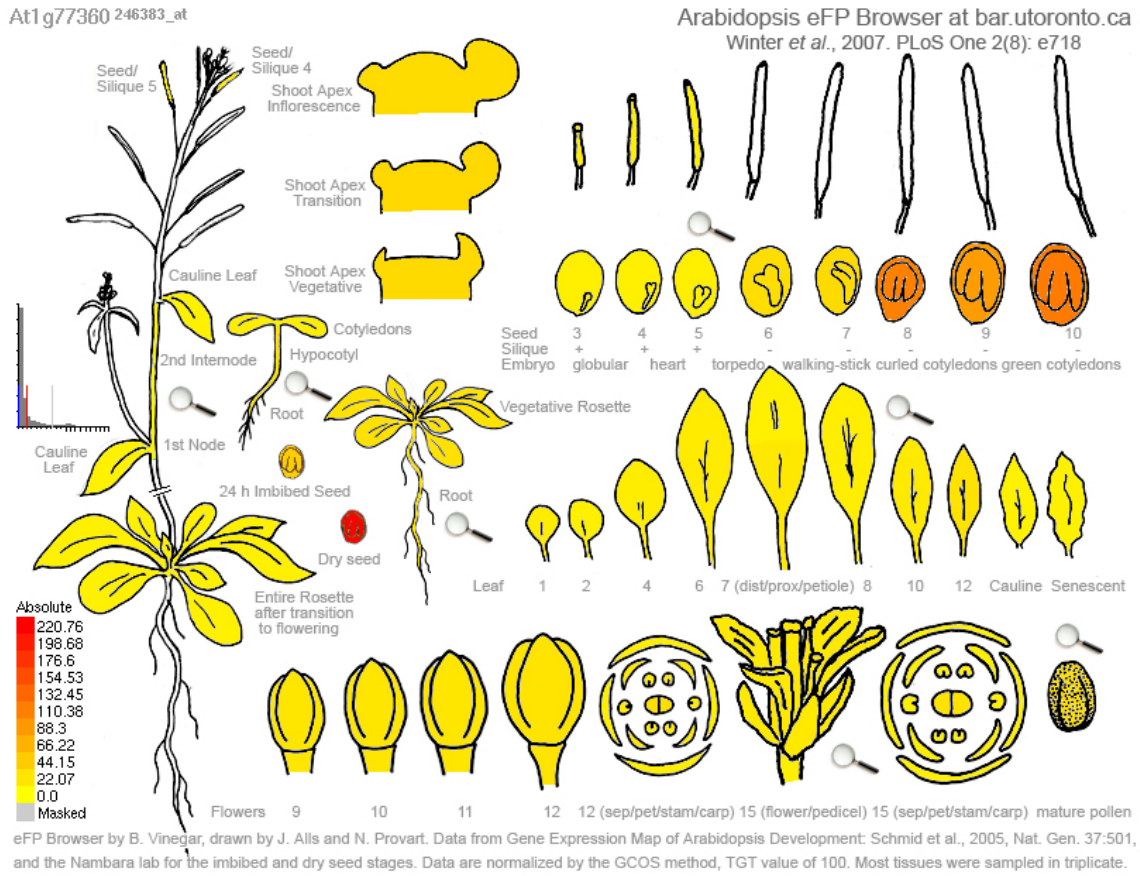

**Supplemental Figure 8.** *APPR6* Expression Profile Determined by the *Arabidopsis* eFP Browser.



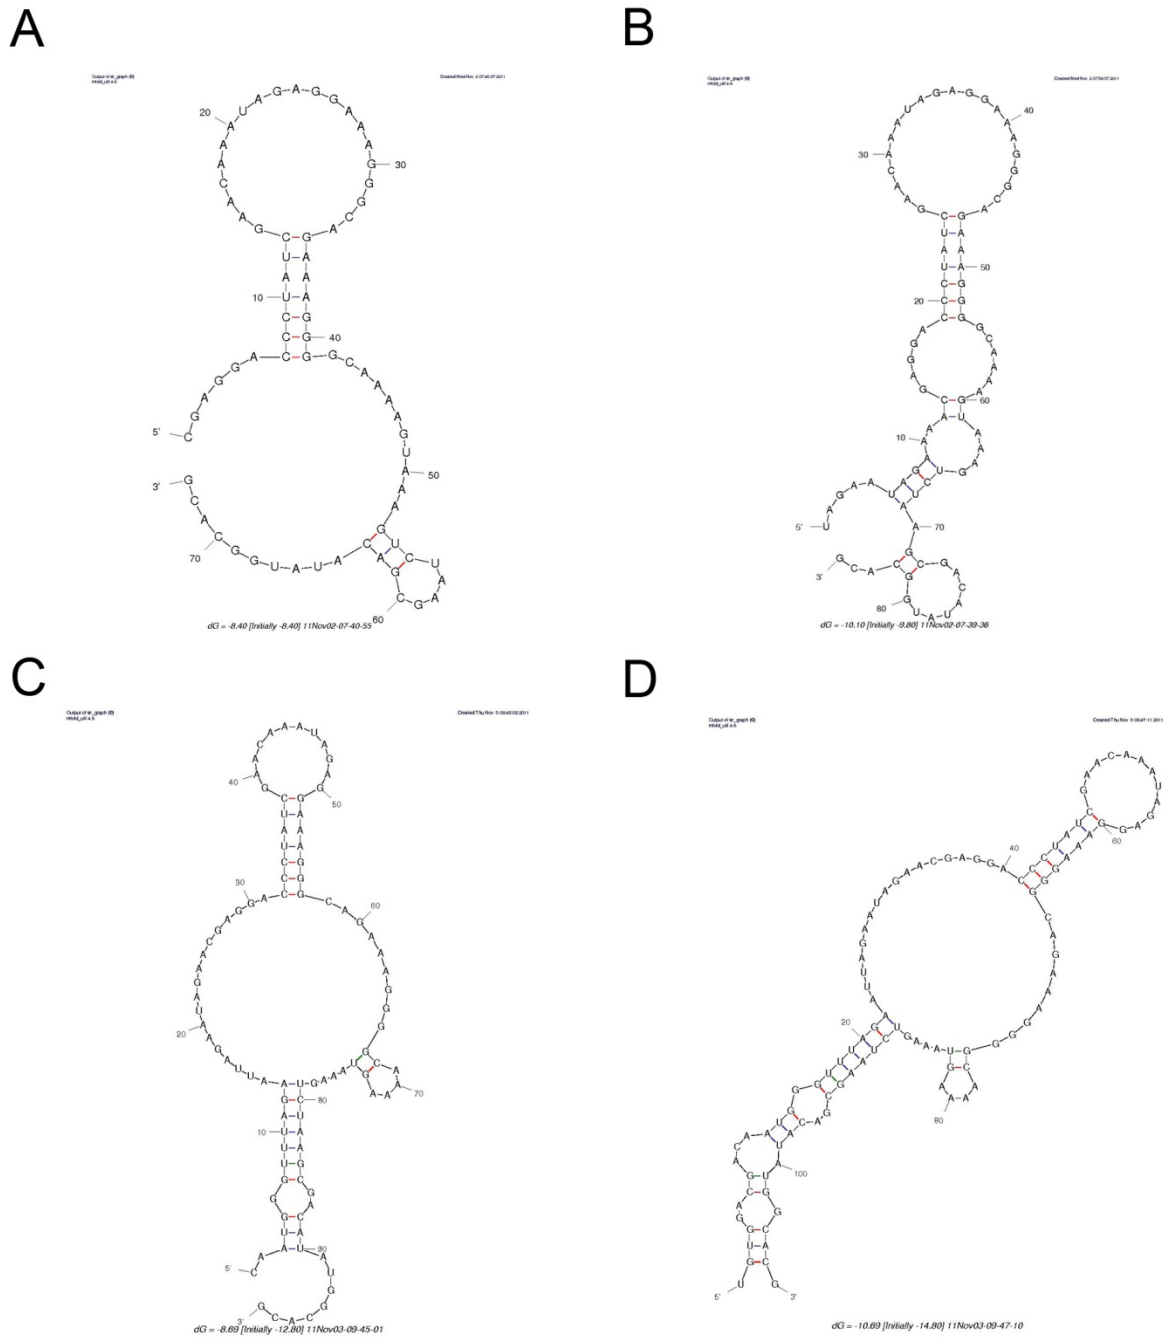

**Supplemental Figure 9.** Secondary Structure of *rps3* 5' UTRs Determined by M-fold.

(A) WT *rps3* 5' UTR (-65 to +8). dG = -8.40 (initially -8.40)

(B) *rps3* 5' UTR1 in *mppr6*<sup>-/-</sup> (-75 to +8). dG = -10.10 (initially -9.80)

(C) *rps3* 5' UTR2 in *mppr6*<sup>-/-</sup> (-90 to +8). dG = -8.69 (initially -12.80)

(D) *rps3* 5' UTR3 in *mppr6*<sup>-/-</sup> (-99 to +8). dG = -10.69 (initially -14.80)

**Supplemental Table 1.** Names and Sequences of Used Primers.

| Primer name    | Sequence 5' → 3'                                                         |
|----------------|--------------------------------------------------------------------------|
| mppr6_1fw      | AGTGATATGCTTGCCGCTGGTTGC                                                 |
| mppr6_2rev     | AATCCCATCCTTCTCCATATCCAAAAAT                                             |
| mppr6_3fw      | ATGGTAGGATCCATGGGTGGCTTCCACTTCCACCAC                                     |
| mppr6_3rev     | ATGGTAGAAGACAAGGATCCAGGTGCTTGAGGACGCTCTC                                 |
| mppr6_4fw      | GATGGGATTATGCCTGATGTTGTTGTGT                                             |
| mppr6_4rev     | GTCCGAGGCGTCCACCGAGATA                                                   |
| mppr6_5fw      | GGTTAATATGGGATGGGTAGATGCTCA                                              |
| mppr6_5rev     | CGTGCTCGAGGGCGGATGC                                                      |
| mppr6_6fw      | ATGGTAGGTCTCAAATGGGTGGCTTCCACTTCCACCAC                                   |
| mppr6_6rev     | ATGGTAGGTCTCAGCGCTATCAAACAAAGGTTCTTGAGCGAG                               |
| mppr6_7rev     | TAATTCTAGATCAATCAAACAAAGGTTCTTGAGCGAG                                    |
| mppr6_8fw      | ATATATACTAGTGATGACGACGACAAGGAGCACGAGCTCGACCATAG                          |
| mppr6_8rev     | C<br>ATATATCTCGAGTTATTTTTCGAACTGCGGGTGGCTCCAAGCGCTATCA                   |
| mppr6_9rev     | AACAAAGGTTCTTGAGCGAG<br>TAATGGATCCTCATTTTTCGAACTGCGGGTGGCTCCAGCTAGCATCAA |
| F1 =           | ACAAAGGTTCTTGAGCGAG                                                      |
| mppr6_1fw      | AGTGATATGCTTGCCGCTGGTTGC                                                 |
| F2             | GATGAAGCTCTTGGCATTGTG                                                    |
| R1 =           | AATCCCATCCTTCTCCATATCCAAAAAT                                             |
| mppr6_2rev     |                                                                          |
| R2             | ATTTTGCCGATTTTCGGAAC                                                     |
| R3             | ATGGTAGGTCTCAGCGCTATCACACAACGGCTCATTGACCA                                |
| R4             | CGAGGTGAACAAGATCTCTGG                                                    |
| rps3at_1fw     | TAATTACGACTCACTATAGGGCTCAGACTTTCGAGAACAAATATTG                           |
| rps3at_1rev    | CGTGCCATATTTTTGACTTTATGG                                                 |
| rps3at_2fw     | TAATACGACTCACTATAGGGAATGGTTCGCAGGTTCAAGTC                                |
| rps3at_2rev    | AATCGGATTTCTTTTTTCGTG                                                    |
| rps3_1fw       | TAGTTCAGATCCAAGTCGGTTCAGTG                                               |
| rps3_1rev      | CCGAGACGAAAGCCAAAGGTG                                                    |
| rps3_2fw       | GAAACTGTGGACGACAATGG                                                     |
| rps3_2rev      | CAACCCGTAGGATTTCTTTT                                                     |
| rps3_3fw       | GGATACCATGACCGATCACC                                                     |
| rps3_3rev      | CGGGCATACTCATAAAATGG                                                     |
| rps3_4fw       | AAGCTCGACCAGCGATAAAA                                                     |
| rps3-rpl16_5fw | TGGATGGTGTGAGTTTGTCA                                                     |
| rps3_5rev      | TGAACCGACTTGGATCTGAA                                                     |
| rps3-rpl16_6fw | CGCATAAACCATGTTTCGTCA                                                    |
| rps3_6rev      | CAAATAGAGGAAAGGGCAGA                                                     |
| rps3_7fw       | TAATACGACTCACTATAGGGCACAACCGCGGTATGAGTTCT                                |
| rps3_7rev      | TCGTCCACAGTTTCCTTGTG                                                     |
| rps3_8fw       | TAATACGACTCACTATAGGGGACAAGGAACTGTGGACGA                                  |
| rps3_8rev      | TGTTTCGATAGGGTCCCTCGTT                                                   |
| rps3_9fw       | TAATACGACTCACTATAGGGAACGAGGACCCTATCGAACA                                 |
| rps3_9rev      | CGTGCCATATGTCGCTTAGAC                                                    |
| rps3_10fw      | AAGGAAACTGTGGACGACAA                                                     |
| rps3_10rev     | AGGTGGACGTATCGAACTGA                                                     |
| rps3_11        | TCGTGCCATATGTCGCTTAG                                                     |
| rps3_80-mer as | AGCTTCCTCCCTTCGCTCCCCCATCGTAGATGGTTCAGCCACACCCGG                         |
|                | TGCCACGAAATGATTGAGAACTACGACGGGG                                          |

**Supplemental Table 1. continued**

|                    |                                                                                      |
|--------------------|--------------------------------------------------------------------------------------|
| 18S rRNA_80-mer as | CGTTGTATCGAATTAACCACATGCTCCACCGCTTGTGCAGGCCCCCGT<br>CAATTCCCTTTGAGTTTCGGTCTTGCGACCGT |
| 26S rRNA_80-mer as | CCCTCTCGACTTTGGATCTTAGCACCCAATCAGTCTGTCTGTACTAAGG<br>ATGACGGCCTGTATTCGGAGTTTCCCTGGGG |
| ccmC_rev           | GATTGGAATGGGCATAGGAA                                                                 |
| nda9_1fw           | TAATACGACTCACTATAGGGCGCAGATTTGAAGTTGTCCA                                             |
| nda9_1rev          | AATCCGGATGATTGATGGAA                                                                 |
| nda9_2fw           | GTCAGTCCATTTCCATCAGC                                                                 |
| nda9_2rev          | CTGTTCCAAGGACTAGCAA                                                                  |
| rps7_1fw           | TAATACGACTCACTATAGGGCTCGAACTGAACGCGATGTA                                             |
| rps7_1rev          | GTTTCAAAGCTGCTCCAAGG                                                                 |
| rps7_2fw           | ATGGTTGACGCCGTAGATAA                                                                 |
| rps7_2rev          | ACGTGAAATCCCCCTCTTC                                                                  |
| emp4_1fw           | ATTAGGATCCATGTGCATCTCAGTCCGCCACGGG                                                   |
| emp4_1rev          | TAATGGATCCCTGCCGAAAATTCTACTTCATCAGA                                                  |
| Muoligo1           | TCYAAAMCASAGAAGCCAACGCCAASGCCTC                                                      |
| Muoligo2           | CYCTCTTCKTCCATAATGGCAATTATCTC                                                        |
| OmuA               | CTTCGTCCATAATGGCAATTATCTC                                                            |
| PPR_R03            | ACAATGTCAGGCTGGCAACC                                                                 |
| PPR_F03            | GAAATGGGTGGCTTCCACTTC                                                                |
